# Supplementary material for: Deep Sequencing Identifies Noncanonical Editing of Ebola and Marburg Virus RNAs in Infected Cells
Source: PubMed Central journal article supplement — mBio. 2014 Nov 4;5(6):e02011-14. doi: 10.1128/mBio.02011-14 (PMC4222107; doi:10.1128/mbio.02011-14), 2014-11-04
Supplement: mbo005142045st1.pdf [file mbo005142045st1.pdf]

**Supplementary Table 1. Total number of reads and virus specific reads for each group**

| <b>Virus</b> | <b>Cell Line</b> | <b>Hours Post Infection</b> | <b>Total Reads</b> | <b>Viral Reads</b> | <b>Viral Bases Sequenced (M)</b> | <b>Percentage Viral Reads</b> | <b>Average Genome Coverage</b> |
|--------------|------------------|-----------------------------|--------------------|--------------------|----------------------------------|-------------------------------|--------------------------------|
| EBOV         | Thp1             | Mock                        | 35,875,581         | -                  |                                  |                               |                                |
|              |                  | 6                           | 34,538,060         | 9,130              | 0.9                              | 0.03%                         | 48                             |
|              |                  | 12                          | 26,658,967         | 65,306             | 6.6                              | 0.24%                         | 343                            |
|              |                  | 24                          | 22,665,814         | 1,015,290          | 102.5                            | 4.48%                         | 5331                           |
|              | Vero             | Mock                        | 28,579,380         |                    |                                  |                               |                                |
|              |                  | 6                           | 33,067,403         | 18,338             | 1.9                              | 0.06%                         | 96                             |
|              |                  | 12                          | 28,395,974         | 256,835            | 25.9                             | 0.90%                         | 1349                           |
|              |                  | 24                          | 26,716,874         | 1,827,362          | 184.5                            | 6.84%                         | 9595                           |
| MARV         | Thp1             | Mock                        | 44,281,028         | -                  |                                  |                               |                                |
|              |                  | 6                           | 45,396,771         | 1,424              | 0.1                              | 0.00%                         | 7                              |
|              |                  | 12                          | 30,550,458         | 10,811             | 1.1                              | 0.04%                         | 56                             |
|              |                  | 24                          | 27,096,435         | 396,021            | 39.9                             | 1.46%                         | 2055                           |
|              | Vero             | Mock                        | 36,384,342         | -                  |                                  |                               |                                |
|              |                  | 6                           | 40,074,951         | 3,760              | 0.4                              | 0.01%                         | 20                             |
|              |                  | 12                          | 38,323,861         | 69,981             | 7.1                              | 0.18%                         | 363                            |
|              |                  | 24                          | 37,500,752         | 1,114,825          | 112.5                            | 2.97%                         | 5790                           |
