# Supplementary material for: Deep Sequencing Identifies Noncanonical Editing of Ebola and Marburg Virus RNAs in Infected Cells
Source: PubMed Central journal article supplement — mBio. 2014 Nov 4;5(6):e02011-14. doi: 10.1128/mBio.02011-14 (PMC4222107; doi:10.1128/mbio.02011-14), 2014-11-04
Supplement: mbo005142045st3.pdf [file mbo005142045st3.pdf]

### Supplemental Table 3. Ebola virus quasiespecies

| 12 hpi Vero      |             |       |       |       |       |        |                    |                                      |            |
|------------------|-------------|-------|-------|-------|-------|--------|--------------------|--------------------------------------|------------|
| Genome position* | Designation | A     | C     | G     | T     | Change | % of minor variant | Type of change                       | Amino acid |
| 1974             | NP ORF      | 0     | 3546  | 0     | 856   | C/T    | 19%                | subst_NONSYNONYMOUS[TcG:S TtG:L U]** | 502        |
| 3618             | VP35 ORF    | 836   | 0     | 2654  | 1     | G/A    | 24%                | subst_NONSYNONYMOUS[GCC:A aCC:T c]   | 164        |
| 5219             | VP40 ORF    | 0     | 564   | 0     | 1660  | T/C    | 25%                | subst_synonymous[TTT:F TTc:F c]      | 247        |
| 7213             | GP ORF      | 2     | 2040  | 0     | 133   | C/T    | 6%                 | subst_NONSYNONYMOUS[CCG:P CtG:L U]   | 392        |
| 7668             | GP ORF      | 0     | 1831  | 0     | 587   | C/T    | 24%                | subst_NONSYNONYMOUS[TAG: cAG:Q U]    | 544        |
| 7691             | GP ORF      | 832   | 0     | 1272  | 0     | G/A    | 40%                | subst_synonymous[AAG:K AAa:K c]      | 551        |
| 7706             | GP ORF      | 100   | 0     | 2176  | 0     | G/A    | 4%                 | subst_synonymous[GTG:V GTa:V c]      | 556        |
| 10866            | VP24 ORF    | 483   | 0     | 158   | 0     | A/G    | 25%                | subst_synonymous[GGA:G GGg:G c]      | 174        |
| 24 hpi Vero      |             |       |       |       |       |        |                    |                                      |            |
| Genome position  | Designation | A     | C     | G     | T     | Change | % of minor variant | Type of change                       | Amino acid |
| 1974             | NP ORF      | 5     | 14182 | 5     | 3549  | C/T    | 20%                | subst_NONSYNONYMOUS[TcG:S TtG:L U]   | 502        |
| 3618             | VP35 ORF    | 4339  | 2     | 13126 | 2     | G/A    | 25%                | subst_NONSYNONYMOUS[GCC:A aCC:T c]   | 164        |
| 5219             | VP40 ORF    | 1     | 6034  | 1     | 16690 | T/C    | 27%                | subst_synonymous[TTT:F TTc:F c]      | 247        |
| 7213             | GP ORF      | 3     | 26121 | 2     | 1600  | C/T    | 6%                 | subst_NONSYNONYMOUS[CCG:P CtG:L U]   | 392        |
| 7668             | GP ORF      | 3     | 22322 | 6     | 7661  | C/T    | 26%                | subst_NONSYNONYMOUS[TAG: cAG:Q U]    | 544        |
| 7691             | GP ORF      | 10777 | 2     | 15988 | 4     | G/A    | 40%                | subst_synonymous[AAG:K AAa:K c]      | 551        |
| 7706             | GP ORF      | 1300  | 3     | 27939 | 1     | G/A    | 4%                 | subst_synonymous[GTG:V GTa:V c]      | 556        |
| 10866            | VP24 ORF    | 4375  | 1     | 1397  | 0     | A/G    | 24%                | subst_synonymous[GGA:G GGg:G c]      | 174        |
| 12 hpi Thp1      |             |       |       |       |       |        |                    |                                      |            |
| Genome position  | Designation | A     | C     | G     | T     | Change | % of minor variant | Type of change                       | Amino acid |
| 1974             | NP ORF      | 0     | 878   | 1     | 188   | C/T    | 18%                | subst_NONSYNONYMOUS[TcG:S TtG:L U]   | 502        |
| 3618             | VP35 ORF    | 145   | 0     | 452   | 0     | G/A    | 24%                | subst_NONSYNONYMOUS[GCC:A aCC:T c]   | 164        |
| 5219             | VP40 ORF    | 0     | 153   | 0     | 406   | T/C    | 27%                | subst_synonymous[TTT:F TTc:F c]      | 247        |
| 7213             | GP ORF      | 0     | 1299  | 1     | 85    | C/T    | 6%                 | subst_NONSYNONYMOUS[CCG:P CtG:L U]   | 392        |
| 7668             | GP ORF      | 0     | 391   | 0     | 119   | C/T    | 23%                | subst_NONSYNONYMOUS[TAG: cAG:Q U]    | 544        |
| 7691             | GP ORF      | 168   | 0     | 254   | 0     | G/A    | 40%                | subst_synonymous[AAG:K AAa:K c]      | 551        |
| 10866            | VP24 ORF    | 123   | 0     | 27    | 0     | A/G    | 18%                | subst_synonymous[GGA:G GGg:G c]      | 174        |
| 24 hpi Thp1      |             |       |       |       |       |        |                    |                                      |            |
| Genome position  | Designation | A     | C     | G     | T     | Change | % of minor variant | Type of change                       | Amino acid |
| 1974             | NP ORF      | 0     | 9385  | 3     | 2131  | C/T    | 18%                | subst_NONSYNONYMOUS[TcG:S TtG:L U]   | 502        |
| 3618             | VP35 ORF    | 1776  | 0     | 5977  | 0     | G/A    | 23%                | subst_NONSYNONYMOUS[GCC:A aCC:T c]   | 164        |
| 5219             | VP40 ORF    | 0     | 2242  | 1     | 7187  | T/C    | 24%                | subst_synonymous[TTT:F TTc:F c]      | 247        |
| 7213             | GP ORF      | 5     | 32325 | 16    | 1937  | C/T    | 6%                 | subst_NONSYNONYMOUS[CCG:P CtG:L U]   | 392        |
| 7668             | GP ORF      | 0     | 8288  | 0     | 2810  | C/T    | 25%                | subst_NONSYNONYMOUS[TAG: cAG:Q U]    | 544        |
| 7691             | GP ORF      | 3430  | 3     | 5992  | 2     | G/A    | 36%                | subst_synonymous[AAG:K AAa:K c]      | 551        |
| 7706             | GP ORF      | 493   | 1     | 9929  | 1     | G/A    | 5%                 | subst_synonymous[GTG:V GTa:V c]      | 556        |
| 10866            | VP24 ORF    | 2127  | 0     | 640   | 1     | A/G    | 23%                | subst_synonymous[GGA:G GGg:G c]      | 174        |

\*MAIN gi|10313991|ref|NC\_002549.1| Ebola virus - Mayinga, Zaire, 1976 strain Mayinga:

\*\*ORF type of change example; "subst\_NONSYNONYMOUS[GAG:E GAt:D c]" the substitution is nonsynonymous where the codon of the reference strain GAG (codes for E=glutamic acid) is changed to GAT (codes for D=aspartic acid) and the lower case c indicates this is a conservative substitution.
