# Supplementary material for: Deep Sequencing Identifies Noncanonical Editing of Ebola and Marburg Virus RNAs in Infected Cells
Source: PubMed Central journal article supplement — mBio. 2014 Nov 4;5(6):e02011-14. doi: 10.1128/mBio.02011-14 (PMC4222107; doi:10.1128/mbio.02011-14), 2014-11-04
Supplement: mbo005142045st4.pdf [file mbo005142045st4.pdf]

**Supplemental Table 4. Marburg virus quasispecies**

| 12 hpi Vero      |             |      |     |     |      |        |                    |                                       |            |
|------------------|-------------|------|-----|-----|------|--------|--------------------|---------------------------------------|------------|
| Genome position* | Designation | A    | C   | G   | T    | Change | % of minor variant | Type of change                        | Amino acid |
| 2590             | NP 3'-UTR   | 0    | 39  | 0   | 580  | T/C    | 6%                 | 3'-UTR +398**                         |            |
| 2598             | NP 3'-UTR   | 0    | 36  | 0   | 554  | T/C    | 6%                 | 3'-UTR +406                           |            |
| 2640             | NP 3'-UTR   | 0    | 39  | 0   | 439  | T/C    | 8%                 | 3'-UTR +448                           |            |
| 2643             | NP 3'-UTR   | 0    | 40  | 0   | 440  | T/C    | 8%                 | 3'-UTR +451                           |            |
| 2663             | NP 3'-UTR   | 0    | 40  | 0   | 457  | T/C    | 8%                 | 3'-UTR +471                           |            |
| 2834             | NP 3'-UTR   | 78   | 0   | 27  | 0    | A/G    | 26%                | 3'-UTR +642                           |            |
| 2836             | NP 3'-UTR   | 0    | 11  | 0   | 39   | T/C    | 22%                | 3'-UTR +644                           |            |
| 3400             | VP35 ORF    | 660  | 0   | 0   | 76   | A/T    | 10%                | subst_NONSYNONYMOUS[TTA:L TTt:F c]*** | 152        |
| 4283             | VP35 3'-UTR | 0    | 27  | 0   | 243  | T/C    | 10%                | 3'-UTR +348                           |            |
| 24 hpi Vero      |             |      |     |     |      |        |                    |                                       |            |
| Genome position* | Designation | A    | C   | G   | T    | Change | % of minor variant | Type of change                        | Amino acid |
| 2590             | NP 3'-UTR   | 0    | 687 | 0   | 8164 | T/C    | 8%                 | 3'-UTR +398                           |            |
| 2598             | NP 3'-UTR   | 1    | 674 | 0   | 7755 | T/C    | 8%                 | 3'-UTR +406                           |            |
| 2640             | NP 3'-UTR   | 0    | 704 | 1   | 5946 | T/C    | 11%                | 3'-UTR +448                           |            |
| 2643             | NP 3'-UTR   | 1    | 699 | 1   | 5968 | T/C    | 10%                | 3'-UTR +451                           |            |
| 2663             | NP 3'-UTR   | 0    | 800 | 1   | 6101 | T/C    | 12%                | 3'-UTR +471                           |            |
| 2724             | NP 3'-UTR   | 1    | 926 | 0   | 8981 | T/C    | 9%                 | 3'-UTR +532                           |            |
| 2822             | NP 3'-UTR   | 0    | 566 | 0   | 5349 | T/C    | 10%                | 3'-UTR +630                           |            |
| 2824             | NP 3'-UTR   | 2    | 568 | 1   | 5080 | T/C    | 10%                | 3'-UTR +632                           |            |
| 2834             | NP 3'-UTR   | 947  | 0   | 224 | 0    | A/G    | 19%                | 3'-UTR +642                           |            |
| 2836             | NP 3'-UTR   | 0    | 108 | 0   | 350  | T/C    | 24%                | 3'-UTR +644                           |            |
| 3400             | VP35 ORF    | 9126 | 6   | 6   | 2038 | A/T    | 18%                | subst_NONSYNONYMOUS[TTA:L TTt:F c]    | 152        |
| 4283             | VP35 3'-UTR | 1    | 346 | 0   | 3801 | T/C    | 8%                 | 3'-UTR +348                           |            |
| 24 hpi Thp1      |             |      |     |     |      |        |                    |                                       |            |
| Genome position* | Designation | A    | C   | G   | T    | Change | % of minor variant | Type of change                        | Amino acid |
| 2590             | NP 3'-UTR   | 0    | 173 | 0   | 1745 | T/C    | 9%                 | 3'-UTR +398                           |            |
| 2598             | NP 3'-UTR   | 0    | 165 | 0   | 1627 | T/C    | 9%                 | 3'-UTR +406                           |            |
| 2640             | NP 3'-UTR   | 0    | 141 | 0   | 779  | T/C    | 15%                | 3'-UTR +448                           |            |
| 2643             | NP 3'-UTR   | 0    | 140 | 0   | 799  | T/C    | 15%                | 3'-UTR +451                           |            |
| 2663             | NP 3'-UTR   | 0    | 169 | 0   | 863  | T/C    | 16%                | 3'-UTR +471                           |            |
| 2724             | NP 3'-UTR   | 0    | 174 | 1   | 1076 | T/C    | 14%                | 3'-UTR +532                           |            |
| 2836             | NP 3'-UTR   | 0    | 9   | 0   | 17   | T/C    | 35%                | 3'-UTR +644                           |            |
| 3400             | VP35 ORF    | 3212 | 2   | 0   | 676  | A/T    | 17%                | subst_NONSYNONYMOUS[TTA:L TTt:F c]    | 152        |
| 4283             | VP35 3'-UTR | 0    | 63  | 0   | 314  | T/C    | 17%                | 3'-UTR +348                           |            |
| 8433             | GP 3'-UTR   | 2265 | 0   | 103 | 0    | A/G    | 4%                 | 3'-UTR +446                           |            |

\*MAIN gij91177679|gb|DQ447653.1| Lake Victoria marburgvirus - Angola2005 strain Ang1379c, complete genome:

\*\* UTR type of change example; "3-UTR +398". A change present in the 3'-UTR of the Designated gene 398 nucleotides from the stop codon.

\*\*\*Type of change example; "subst\_NONSYNONYMOUS[GAG:E GAt:D c]" the substitution is nonsynonymous where the codon of the reference strain GAG (codes for E=glutamic acid) is changed to GAT (codes for D=aspartic acid) and the lower case c indicates this is a conservative substitution.
