# Supplementary material for: Deep Sequencing Identifies Noncanonical Editing of Ebola and Marburg Virus RNAs in Infected Cells
Source: PubMed Central journal article supplement — mBio. 2014 Nov 4;5(6):e02011-14. doi: 10.1128/mBio.02011-14 (PMC4222107; doi:10.1128/mbio.02011-14), 2014-11-04
Supplement: mbo005142045st5.pdf [file mbo005142045st5.pdf]

**Supplemental Table 5. Insertion frequencies at Ebola polynucleotide regions**

| Genome coordinates*                         | mRNA Thp1 @24hpi Random shear |               | mRNA Thp1 @24hpi (amplicon) Amplicon |               | mRNA in Vero @24hpi Random shear |               | vRNA Vero @ 24hpi Amplicon |               | vRNA Vero @ 1hpi Amplicon |               | Plasmid amplicon Amplicon |               | Pol II derived Amplicon Amplicon |               |
|---------------------------------------------|-------------------------------|---------------|--------------------------------------|---------------|----------------------------------|---------------|----------------------------|---------------|---------------------------|---------------|---------------------------|---------------|----------------------------------|---------------|
|                                             | Polynucleotide                | %**           | Polynucleotide                       | %             | Polynucleotide                   | %             | Polynucleotide             | %             | Polynucleotide            | %             | Polynucleotide            | %             | Polynucleotide                   | %             |
| <b>EBOV GP (virus/plasmid 7A) 6918-6924</b> | AAAAAA                        | 0.25%         | AAAAAA                               | 0.14%         | AAAAAA                           | 0.50%         | AAAAAA                     | 0.25%         | AAAAAA                    | 0.32%         | AAAAAA                    | 0.03%         | AAAAAA                           | 0.27%         |
|                                             | AAAAAAA                       | 67.92%        | AAAAAAA                              | 69.78%        | AAAAAAA                          | 71.65%        | AAAAAAA                    | 82.87%        | AAAAAAA                   | 97.55%        | AAAAAAA                   | 99.76%        | AAAAAAA                          | 98.71%        |
|                                             | AAAAAAA                       | 28.04%        | AAAAAAA                              | 27.39%        | AAAAAAA                          | 25.90%        | AAAAAAA                    | 15.50%        | AAAAAAA                   | 1.76%         | AAAAAAA                   | 0.00%         | AAAAAAA                          | 0.79%         |
|                                             | AAAAAAA                       | 1.91%         | AAAAAAA                              | 1.40%         | AAAAAAA                          | 1.26%         | AAAAAAA                    | 0.74%         | AAAAAAA                   | 0.05%         | AAAAAAA                   | 0.00%         | AAAAAAA                          | 0.01%         |
|                                             | AAAAAAA                       | 1.73%         | AAAAAAA                              | 1.17%         | AAAAAAA                          |               | AAAAAAA                    | 0.48%         | AAAAAAA                   | 0.01%         |                           |               |                                  |               |
| <b>Total reads</b>                          | <b>6078</b>                   | <b>99.84%</b> | <b>8631084</b>                       | <b>99.88%</b> | <b>8273</b>                      | <b>99.31%</b> | <b>4687772</b>             | <b>99.84%</b> | <b>4933361</b>            | <b>99.68%</b> | <b>336069</b>             | <b>99.80%</b> | <b>629236</b>                    | <b>99.78%</b> |
| <b>EBOV GP (plasmid 8A) 6918-6925</b>       |                               |               |                                      |               |                                  |               |                            |               |                           |               | AAAAAA                    | 0.00%         | AAAAAA                           | 0.06%         |
|                                             |                               |               |                                      |               |                                  |               |                            |               |                           |               | AAAAAAA                   | 0.82%         | AAAAAAA                          | 0.85%         |
|                                             |                               |               |                                      |               |                                  |               |                            |               |                           |               | AAAAAAA                   | 98.38%        | AAAAAAA                          | 95.99%        |
|                                             |                               |               |                                      |               |                                  |               |                            |               |                           |               | AAAAAAA                   | 0.47%         | AAAAAAA                          | 2.81%         |
| <b>Total reads</b>                          |                               |               |                                      |               |                                  |               |                            |               |                           | <b>566972</b> | <b>99.68%</b>             | <b>579535</b> | <b>99.70%</b>                    |               |
| <b>EBOV GP 6378-6383</b>                    | AAAAA                         | 0.21%         |                                      |               | AAAAA                            | 0.18%         | AAAAA                      | 0.12%         | AAAAA                     | 0.09%         | AAAAA                     | 0.08%         | AAAAA                            | 0.14%         |
|                                             | AAAAAA                        | 95.03%        |                                      |               | AAAAAA                           | 96.70%        | AAAAAA                     | 98.65%        | AAAAAA                    | 98.09%        | AAAAAA                    | 99.64%        | AAAAAA                           | 99.16%        |
|                                             | AAAAAAA                       | 4.30%         |                                      |               | AAAAAAA                          | 2.87%         | AAAAAAA                    | 1.08%         | AAAAAAA                   | 1.72%         | AAAAAAA                   | 0.02%         | AAAAAAA                          | 0.59%         |
|                                             | AAAAAAA                       | 0.26%         |                                      |               | AAAAAAA                          | 0.09%         | AAAAAAA                    | 0.04%         | AAAAAAA                   | 0.01%         | AAAAAAA                   | 0.00%         | AAAAAAA                          | 0.00%         |
| <b>Total reads</b>                          | <b>3841</b>                   | <b>99.79%</b> |                                      |               | <b>11358</b>                     | <b>99.84%</b> | <b>914320</b>              | <b>99.89%</b> | <b>5591149</b>            | <b>99.91%</b> | <b>460245</b>             | <b>99.74%</b> | <b>1357538</b>                   | <b>99.89%</b> |
| <b>EBOV VP30 8767-8772</b>                  | AAAAA                         | 0.19%         |                                      |               | AAAAA                            | 0.22%         | AAAAA                      | 0.20%         | AAAAA                     | 0.18%         | AAAAA                     | 0.05%         | AAAAA                            | 0.13%         |
|                                             | AAAAAA                        | 96.99%        |                                      |               | AAAAAA                           | 98.85%        | AAAAAA                     | 98.86%        | AAAAAA                    | 98.94%        | AAAAAA                    | 99.63%        | AAAAAA                           | 99.61%        |
|                                             | AAAAAAA                       | 2.53%         |                                      |               | AAAAAAA                          | 0.81%         | AAAAAAA                    | 0.81%         | AAAAAAA                   | 0.72%         | AAAAAAA                   | 0.06%         | AAAAAAA                          | 0.12%         |
| <b>Total reads</b>                          | <b>2091</b>                   | <b>99.71%</b> |                                      |               | <b>4079</b>                      | <b>99.88%</b> | <b>123615</b>              | <b>99.87%</b> | <b>1384440</b>            | <b>99.83%</b> | <b>735306</b>             | <b>99.74%</b> | <b>180058</b>                    | <b>99.87%</b> |
| <b>EBOV NP 850-855</b>                      | AAAAA                         | 0.06%         |                                      |               | AAAAA                            | 0.09%         | AAAAA                      | 0.10%         | AAAAA                     | 0.05%         | AAAAA                     | 0.01%         | AAAAA                            | 0.11%         |
|                                             | AAAAAA                        | 98.47%        |                                      |               | AAAAAA                           | 99.30%        | AAAAAA                     | 99.45%        | AAAAAA                    | 99.36%        | AAAAAA                    | 99.92%        | AAAAAA                           | 99.57%        |
|                                             | AAAAAAA                       | 1.27%         |                                      |               | AAAAAAA                          | 0.48%         | AAAAAAA                    | 0.33%         | AAAAAAA                   | 0.52%         | AAAAAAA                   | 0.01%         | AAAAAAA                          | 0.24%         |
| <b>Total reads</b>                          | <b>11588</b>                  | <b>99.81%</b> |                                      |               | <b>10728</b>                     | <b>99.86%</b> | <b>1497497</b>             | <b>99.89%</b> | <b>2415959</b>            | <b>99.92%</b> | <b>874663</b>             | <b>99.94%</b> | <b>369576</b>                    | <b>99.92%</b> |
| <b>EBOV NP 1288-1293</b>                    | AAAAA                         | 0.04%         |                                      |               | AAAAA                            | 0.15%         | AAAAA                      | 0.07%         | AAAAA                     | 0.06%         | AAAAA                     | 0.00%         |                                  |               |
|                                             | AAAAAA                        | 98.50%        |                                      |               | AAAAAA                           | 98.91%        | AAAAAA                     | 98.78%        | AAAAAA                    | 99.32%        | AAAAAA                    | 99.93%        |                                  |               |
|                                             | AAAAAAA                       | 1.39%         |                                      |               | AAAAAAA                          | 0.88%         | AAAAAAA                    | 1.07%         | AAAAAAA                   | 0.54%         | AAAAAAA                   | 0.00%         |                                  |               |
| <b>Total reads</b>                          | <b>2598</b>                   | <b>99.92%</b> |                                      |               | <b>6670</b>                      | <b>99.94%</b> | <b>1888297</b>             | <b>99.92%</b> | <b>76513</b>              | <b>99.92%</b> | <b>550404</b>             | <b>99.93%</b> |                                  |               |
| <b>EBOV L 12146-12151</b>                   | UUUUUU                        | 94.48%        |                                      |               | UUUUUU                           | 97.39%        | UUUUUU                     | 94.38%        | UUUUUU                    | 94.09%        | UUUUUU                    | 99.58%        |                                  |               |
|                                             | UUUUUUU                       | 5.34%         |                                      |               | UUUUUUU                          | 2.30%         | UUUUUUU                    | 5.37%         | UUUUUUU                   | 5.67%         | UUUUUUU                   | 0.03%         |                                  |               |
|                                             | UUUUUUUU                      | 0.00%         |                                      |               | UUUUUUUU                         | 0.00%         | UUUUUUUU                   | 0.15%         | UUUUUUUU                  | 0.15%         | UUUUUUUU                  | 0.00%         |                                  |               |
| <b>Total reads</b>                          | <b>562</b>                    | <b>99.82%</b> |                                      |               | <b>1305</b>                      | <b>99.69%</b> | <b>5252884</b>             | <b>99.89%</b> | <b>6455486</b>            | <b>99.90%</b> | <b>1402798</b>            | <b>99.61%</b> |                                  |               |
| <b>EBOV L 17521-17526</b>                   | UUUUUU                        | 92.46%        |                                      |               | UUUUUU                           | 94.08%        | UUUUUU                     | 99.07%        | UUUUUU                    | 99.26%        | UUUUUU                    | 99.92%        |                                  |               |
|                                             | UUUUUUU                       | 7.30%         |                                      |               | UUUUUUU                          | 5.49%         | UUUUUUU                    | 0.73%         | UUUUUUU                   | 0.49%         | UUUUUUU                   | 0.00%         |                                  |               |
|                                             | UUUUUUUU                      | 0.00%         |                                      |               | UUUUUUUU                         | 0.09%         | UUUUUUUU                   | 0.02%         | UUUUUUUU                  | 0.00%         | UUUUUUUU                  | 0.00%         |                                  |               |
| <b>Total reads</b>                          | <b>411</b>                    | <b>99.76%</b> |                                      |               | <b>1166</b>                      | <b>99.66%</b> | <b>585199</b>              | <b>99.82%</b> | <b>100263</b>             | <b>99.76%</b> | <b>2610377</b>            | <b>99.93%</b> |                                  |               |

\*Only sequencing reads with perfect matches to the reference sequence 10 nucleotides to each side of the indicated homopolymer region were examined

\*\*Percent reflects the number of total reads with the indicated homopolymer region. The total number of reads does not add up to 100% because the remaining fraction includes reads which have a nucleotide within this region different than the nucleotide within the homopolymer
