# Supplementary material for: Deep Sequencing Identifies Noncanonical Editing of Ebola and Marburg Virus RNAs in Infected Cells
Source: PubMed Central journal article supplement — mBio. 2014 Nov 4;5(6):e02011-14. doi: 10.1128/mBio.02011-14 (PMC4222107; doi:10.1128/mbio.02011-14), 2014-11-04
Supplement: mbo005142045st6.pdf [file mbo005142045st6.pdf]

**Supplemental Table 6. Insertion frequencies at Marburg-Ang polynucleotide regions**

| Genome coordinates*           | mRNA Thp1 @24hpi<br>Random shear |        | mRNA in Vero @24hpi<br>Random shear |        | vRNA Vero @ 24hpi<br>Amplicon |        | vRNA Vero @ 1hpi<br>Amplicon |        | Plasmid amplicon<br>Amplicon |        | Adrenal Gland<br>Amplicon |        | Axillary LN<br>Amplicon |        | Liver<br>Amplicon |        | Mesenteric LN<br>Amplicon |        |
|-------------------------------|----------------------------------|--------|-------------------------------------|--------|-------------------------------|--------|------------------------------|--------|------------------------------|--------|---------------------------|--------|-------------------------|--------|-------------------|--------|---------------------------|--------|
|                               | Polynucleotide*                  | %      | Polynucleotide                      | %      | Polynucleotide                | %      | Polynucleotide               | %      | Polynucleotide               | %      | Polynucleotide            | %      | Polynucleotide          | %      | Polynucleotide    | %      | Polynucleotide            | %      |
| <b>MARV NP<br/>816-821</b>    | AAAAA                            | 0.00%  | AAAAA                               | 0.05%  | AAAAA                         | 0.09%  | AAAAA                        | 0.07%  | AAAAA                        | 0.01%  | AAAAA                     | 0.08%  | AAAAA                   | 0.08%  | AAAAA             | 0.06%  | AAAAA                     | 0.08%  |
|                               | AAAAAA                           | 91.89% | AAAAAA                              | 87.06% | AAAAAA                        | 98.41% | AAAAAA                       | 98.65% | AAAAAA                       | 99.81% | AAAAAA                    | 99.00% | AAAAAA                  | 98.83% | AAAAAA            | 98.08% | AAAAAA                    | 99.04% |
|                               | AAAAAAA                          | 7.88%  | AAAAAAA                             | 11.73% | AAAAAAA                       | 1.36%  | AAAAAAA                      | 1.12%  | AAAAAAA                      | 0.01%  | AAAAAAA                   | 0.79%  | AAAAAAA                 | 0.92%  | AAAAAAA           | 1.72%  | AAAAAAA                   | 0.73%  |
| <b>Total reads</b>            | 1714                             | 99.77% | 5635                                | 98.85% | 28137                         | 99.86% | 459109                       | 99.84% | 666303                       | 99.83% | 9412642                   | 99.87% | 24815                   | 99.84% | 101814            | 99.86% | 540854                    | 99.85% |
| <b>MARV L<br/>17809-17815</b> | AAAAA                            | 0.00%  | AAAAA                               | 0.06%  | AAAAA                         | 0.09%  | AAAAA                        | 0.02%  | AAAAA                        | 0.15%  |                           |        |                         |        |                   |        |                           |        |
|                               | AAAAAA                           | 80.09% | AAAAAA                              | 80.58% | AAAAAA                        | 98.86% | AAAAAA                       | 99.06% | AAAAAA                       | 99.91% | AAAAAA                    | 97.07% |                         |        |                   |        |                           |        |
|                               | AAAAAAA                          | 19.44% | AAAAAAA                             | 16.54% | AAAAAAA                       | 1.00%  | AAAAAAA                      | 0.80%  | AAAAAAA                      | 0.00%  | AAAAAAA                   | 2.70%  |                         |        |                   |        |                           |        |
| <b>Total reads</b>            | 216                              | 99.54% | 659                                 | 97.12% | 11578                         | 99.92% | 34649                        | 99.95% | 632418                       | 99.92% | 24815                     | 99.92% |                         |        |                   |        |                           |        |

\*Only sequencing reads with perfect matches to the reference sequence 10 nucleotides to each side of the indicated homopolymer region were examined

\*\*Percent reflects the number of total reads with the indicated homopolymer region. The total number of reads does not add up to 100% because the remaining fraction includes reads which have a nucleotide within this region different than the nucleotide within the homopolymer
